# Supplementary material for: The Mode of Stem Cell Division Is Dependent on the Differential Interaction of β-Catenin with the Kat3 Coactivators CBP or p300
Source: PubMed Central journal article supplement (PMC6678591; doi:10.3390/cancers11070962), 2019-07-09

## Supplementary Materials: The Mode of Stem Cell Division Is Dependent on the Differential Interaction of $\beta$ -Catenin with the Kat3 Coactivators CBP or p300

Agnes I. Lukaszewicz, Cu Nguyen, Elizabeth Melendez, David P. Lin, Jia-Ling Teo, Keane K. Y. Lai, Wieland B. Huttner, Song-Hai Shi and Michael Kahn

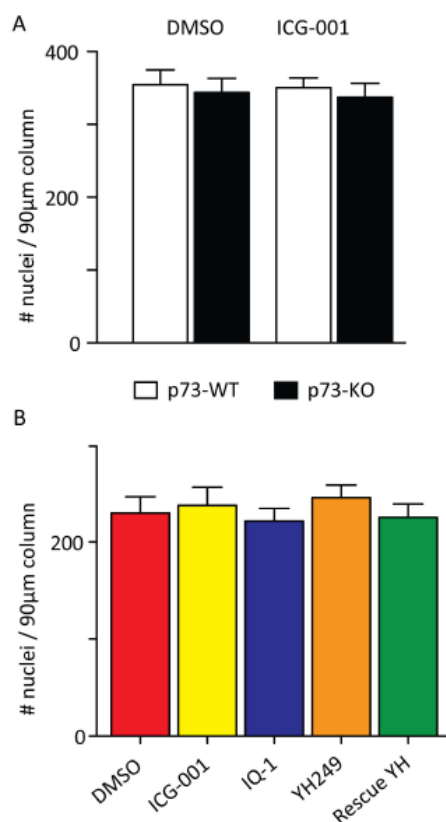

**Figure S1.** Overall cellularity of the cerebral cortex is not affected by p73 knock-out or by specific blockage of the p300/ $\beta$ -catenin interaction. Cellularity was calculated as the number of DAPI+ nuclei under 90  $\mu$ m wide cortical column. E13.5 p73 wild type (WT) and knock-out (KO) embryos treated for 4 days with DMSO present with cellularity similar to E13.5 p73 WT and KO embryos treated with CBP/catenin antagonist ICG-001 for 4 days (A). E12.5 embryos treated for 3 days with DMSO, ICG-001, p300/catenin antagonist IQ-1, p300/catenin antagonist YH249 or both YH249 and ICG-001 (Rescue YH) show similar cellularity (B).  $n \geq 6$ .

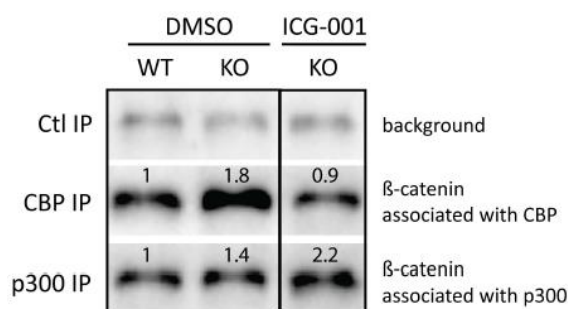

**Figure S2.** p73 knock-out mouse embryos show an increase in the CBP/ $\beta$ -catenin interaction. Numerical values above bands indicate densitometric quantitation normalized to background (Ctl IP) for each treatment condition and then normalized to WT DMSO for CBP IP or p300 IP.

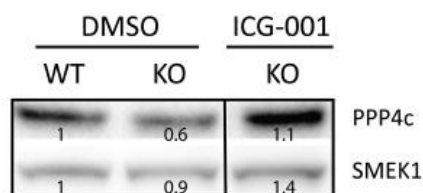

**Figure S3.** p73 regulates PP4, a key factor in mitotic spindle orientation. Numerical values below bands indicate densitometric quantitation normalized to WT DMSO for PPP4c or SMEK1.

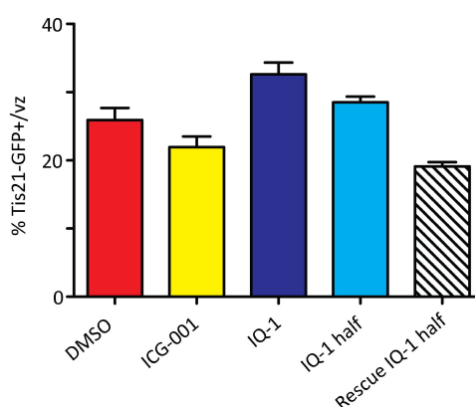

**Figure S4.** Prematurely enhanced neurogenic commitment observed with p300/catenin antagonist IQ-1 treatment is reversed by co-administration of CBP/catenin antagonist ICG-001. Quantification of Tis21-GFP+ cells as a measure of neurogenic commitment. Embryos were treated for 3 days with DMSO, CBP/catenin antagonist ICG-001, full or half dose of p300/catenin antagonist IQ-1 or IQ-1 and ICG-001 (Rescue IQ-1 half). Sections were stained for GFP and NeuN. The percentage of Tis21-GFP+ cells in the ventricular zone was calculated as the number of GFP+ within the NeuN-negative zone. One-way ANOVA followed by Newman-Keuls multiple comparison test showing significant differences between ICG-001 and both IQ-1 conditions, as well as between the rescue condition and both IQ-1 conditions. vz, ventricular zone.  $n \geq 3$ .

**Table S1.** Comparison of PPP4c and SMEK1 mRNA expression in p73. Knock-out (KO) versus Wild-type Mice Treated with CBP/catenin Antagonist versus Control (DMSO).

| Condition                         | PPP4c ( $\Delta\Delta Ct$ ) | SMEK1 ( $\Delta\Delta Ct$ ) |
|-----------------------------------|-----------------------------|-----------------------------|
| WT                                |                             |                             |
| ICG-001/DMSO<br>( $n = 2/n = 4$ ) | -0.11                       | 0.29                        |
| DMSO                              |                             |                             |
| KO/WT<br>( $n = 3/n = 4$ )        | -0.26                       | 0.008                       |
| ICG-001                           |                             |                             |
| KO/WT<br>( $n = 4/n = 3$ )        | 0.22                        | 0.14                        |

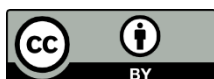

Supplement: cancers-11-00962-s001.pdf [file cancers-11-00962-s001.pdf]
